# Supplementary material for: Strategy to enhance the semicontinuous anaerobic digestion of food waste via exogenous additives: experimental and machine learning approaches
Source: Royal Society of Chemistry journal article supplement (doi:10.1039/d3ra05811e), 2023-01-01
Supplement: d3ra05811e1.pdf [file d3ra05811e1.pdf]

## Supporting Information

### Strategy to enhance semicontinuous anaerobic digestion of food waste via exogenous additives: Experimental and machine learning approaches

Chuan Ding,<sup>a</sup> Yi Zhang,<sup>a</sup> Xindu Li,<sup>a</sup> Qiang Liu,<sup>a</sup> Yeqing Li,<sup>\*a</sup> Yanjuan Lu,<sup>b</sup> Lu Feng,<sup>c</sup>  
Junting Pan,<sup>d</sup> Hongjun Zhou,<sup>\*a</sup>

<sup>a</sup> *State Key Laboratory of Heavy Oil Processing, Beijing Key Laboratory of Biogas Upgrading Utilization, College of New Energy and Materials, China University of Petroleum Beijing (CUPB), Beijing 102249, P. R. China*

<sup>b</sup> *Beijing Fairyland Environmental Technology Co., Ltd, Beijing 100080, P. R. China.*

---

<sup>a</sup> *State Key Laboratory of Heavy Oil Processing, Beijing Key Laboratory of Biogas Upgrading Utilization, College of New Energy and Materials, China University of Petroleum Beijing (CUPB), Beijing 102249, P. R. China. E-mail addresses: liyeqing@cup.edu.cn (Y. Li); zhhj63@163.com (H. Zhou)*

<sup>b</sup> *Beijing Fairyland Environmental Technology Co., Ltd, Beijing 100080, P. R. China.*

<sup>c</sup> *Division of Environment and Natural Resources, Norwegian Institute of Bioeconomy Research (NIBIO), 1431 Ås, Norway.*

<sup>d</sup> *State Key Laboratory of Efficient Utilization of Arid and Semi-arid Arable Land in Northern China, Institute of Agricultural Resources and Regional Planning, Chinese Academy of Agricultural Sciences, Beijing 100081, P. R. Chin.*

<sup>c</sup> *Division of Environment and Natural Resources, Norwegian Institute of Bioeconomy Research (NIBIO), 1431 Ås, Norway.*

<sup>d</sup> *State Key Laboratory of Efficient Utilization of Arid and Semi-arid Arable Land in Northern China, Institute of Agricultural Resources and Regional Planning, Chinese Academy of Agricultural Sciences, Beijing 100081, P. R. China*

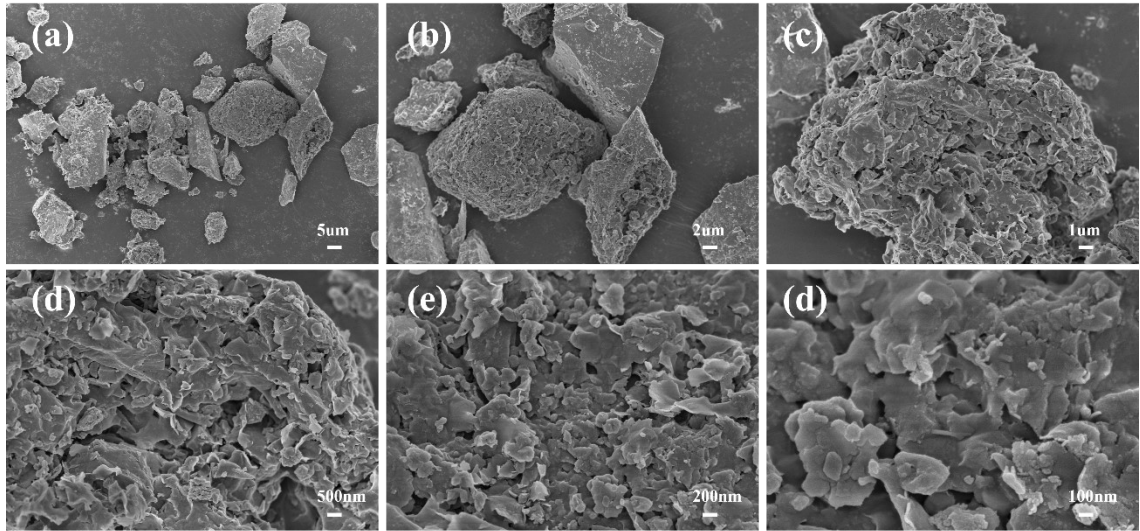

**Fig. S1** SEM images of the additives.

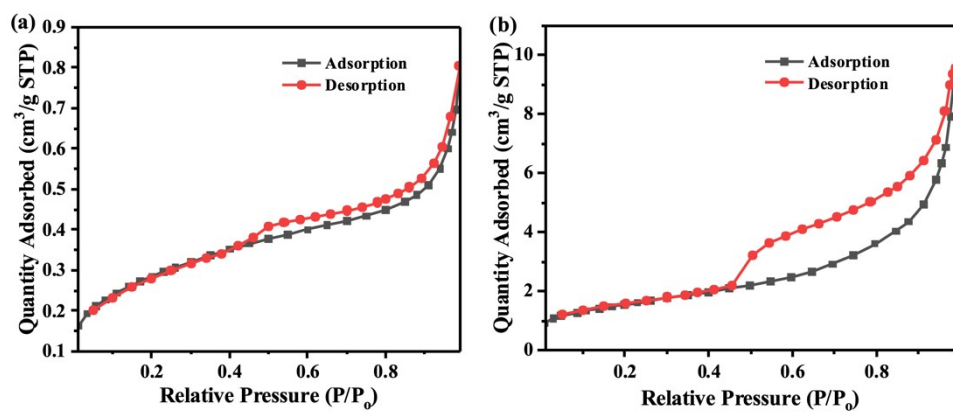

Fig. S2 Nitrogen adsorption-desorption isotherms: (a) metal material, (b) the additives.

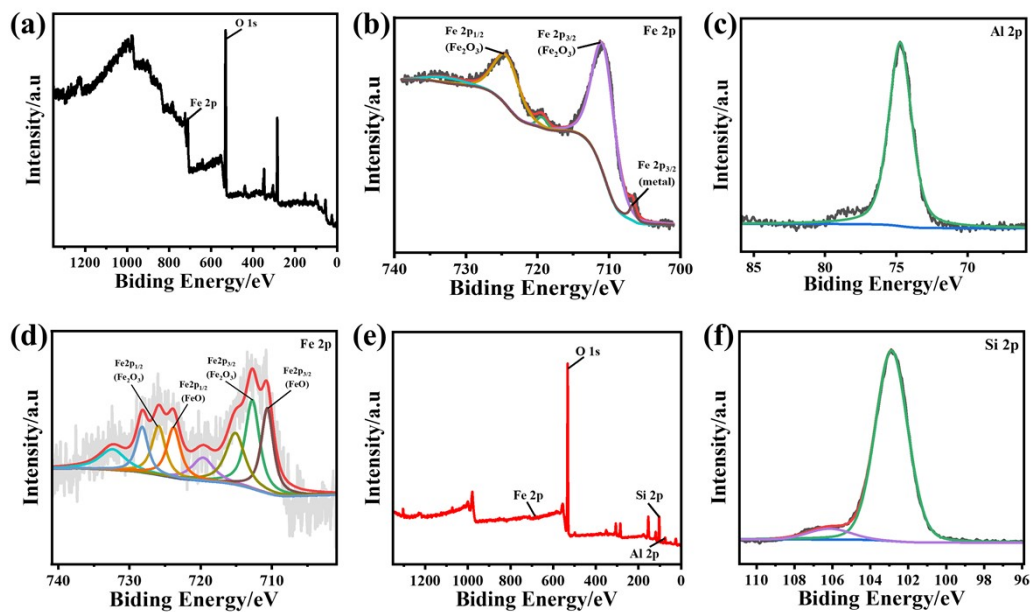

**Fig. S3** The XPS spectra of metal material and the additives. (a) Full spectrum of metal material and (b) Fe 2p of metal material. (c) Full spectrum of additive, (d) Fe 2p of additive, (e) Al 2p of additive and (f) Si 2p of the additives.

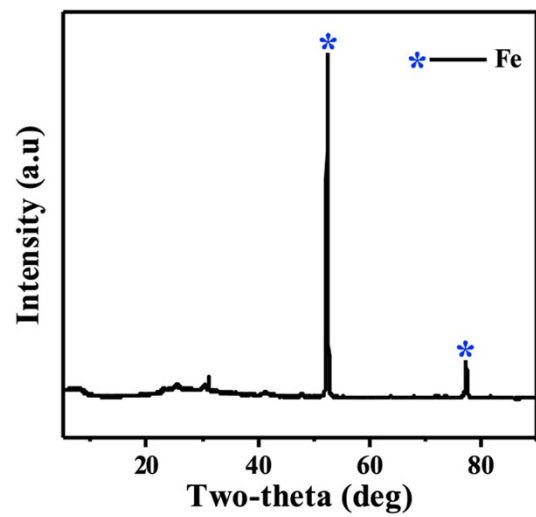

Fig. S4 XRD patterns of the additives, with Fe peaks labeled as\*.

**Table S1**

The pore structure parameters of metal material and the additives.

| Type           | BET<br>(m <sup>2</sup> /g) | Pore volume<br>(cm <sup>3</sup> /g) | Pore size<br>(nm) |
|----------------|----------------------------|-------------------------------------|-------------------|
| Metal material | 1.024                      | 0.001246                            | 4.863             |
| The additives  | 5.471                      | 0.01430                             | 10.457            |
